# Supplementary material for: Comparative Analysis of the Shadoo Gene between Cattle and Buffalo Reveals Significant Differences
Source: PubMed Central journal article supplement (PMC3468620; doi:10.1371/journal.pone.0046601), 2012-10-10
Supplement: pone.0046601.s004.pdf [file pone.0046601.s004.pdf]

**Table S2.** Primers used for sequencing *SPRN* gene in cattle and buffalo.

| <b>Primer</b>             | <b>Sequence(5'→3')</b>      |
|---------------------------|-----------------------------|
| SPRNA_568-F *             | AGGGACCACAGGATCGAACAGACG    |
| SPRNA_804-F <sup>†</sup>  | GGAGCAGTCGGGTCACAGATGGT     |
| SPRNA_926-F               | AGGGCTGGTGCTGCTCTG          |
| SPRNA_1301-R              | ACGGGAGGGAGGGGACA           |
| SPRNA_1146-F              | GGGTGCGAGGTGCTGAAG          |
| SPRNA_1541-R              | GACCAGAGGCGACCCCTG          |
| SPRNA_1458-F              | CGCGGCTGGTAAGACCGG          |
| SPRNA_1883-R              | TGTGGAGCGTGGAGTGCG          |
| SPRNA_1711-F              | CTCACCCGCTTCCTTTGG          |
| SPRNA_2155-R              | GACGGGGCACTCAGGAGCT         |
| SPRNA_2009-F              | AGCCCACTCCCCACTCCT          |
| SPRNA_2503-R              | GCTCCGTCTTCTGCATCCTC        |
| SPRNA_2265-F              | GACGGCAGTGCGCCGAAG          |
| SPRNA_2883-R *            | GGGACTAACCCCAAGCAGGAGGCA    |
| SPRNB_2526-F              | AGAGGCGTCTACAGCTACTGGGCGTGG |
| SPRNA_2978-R <sup>†</sup> | AGCTGGGGTGGCCTGAACAGCCT     |
| SPRNB_3236-R              | GGTGAGGGTGTCTGGGAGT         |
| SPRNB_3146-F              | TCACCCATCCAGCAAGAAG         |
| SPRNB_3703-R              | GATAATTTGAGACCCTGACTG       |
| SPRNB_3679-F              | GTTGCAGTCAGGGTCTCAAATT      |
| SPRNB_3978-R              | GCGTCTGAGGCTGAGCACA         |
| SPRNB_4232-F              | GGGCGCAGCAGGACCTAGA         |
| SPRNB_4472-R              | GCGAGCACCTCCAGCTAAT         |
| SPRNB_4387-F              | GTGCAGGCTGTGGTGGTG          |
| SPRNB_5074-R              | GCTGGCATTCTCAGGAGTT         |
| T-vector-F                | CGCCAGGGTTTTCCCAAGTCACGAC   |
| T-vector-R                | AACAGGC TATGACCATG          |
| RVprimer3                 | CTAGCAAAATAGGCTGTCCC        |
| GLprimer2                 | CTTTATGTTTTTGGCGTCTTCCA     |

\* and <sup>†</sup> indicate the primers used for sequencing the cattle and buffalo gene, respectively.
